# Supplementary material for: Participant concerns for the Learner in a Virtual Reality replication of the Milgram obedience study
Source: PLOS journal article supplement (doi:10.1371/journal.pone.0209704), 2018-12-31
Supplement: S12 (10.1371/journal.pone.0209704.s012) [file journal.pone.0209704.s012]

## S4 Text

### The Priming Questionnaire

To assess the efficacy of the priming a questionnaire was administered after the exposure that consisted of a set of 7 questions that assessed the degree of identification with science, and a further 5 questions to that assessed the degree of identification with students.

**Table 1. Items Used to Assess Priming Efficacy.**

| Variable name | Question                                                      |
|---------------|---------------------------------------------------------------|
| sci1          | I feel good about furthering psychological science            |
| sci2          | I identify with the researchers who designed this study       |
| sci3          | I identify with the goals of psychological science            |
| sci4          | I feel positive about the scientists behind this research     |
| sci5          | I feel strong ties with people who are pro-science.           |
| sci6          | I think of myself as part of the pro-science community        |
| sci7          | I identify with supporters of science.                        |
|               |                                                               |
| nsc1          | I identify with the learner in this study                     |
| nsc2          | I fell positive about the learner in this study               |
| nsc3          | I feel strong ties with other students living in London.      |
| nsc4          | I think of myself as part of the student community in London. |
| nsc5          | I identify with other students living in London               |

Each item was scored on a 1-7 scale, with 1 indicating no agreement and 7 indicating complete agreement.

In order to obtain one overall score for each of these we used polychoric principal components analysis [32]. This is a principal components analysis for ordinal scales, assuming that the ordinal scales are samples from an underlying continuous (latent) variable. In the case of Science

the first principle component (ysci) explained 57% of the variation in the 7 ordinal scores.

Similarly the first principal component for the Students scores (ynsc) explained 58% of the variation of the 5 scores.

**Table 2. Correlations for the Priming Scores**

| Variable | Spearman Correlation with<br>ystu (n = 40) | Spearman correlation with<br>ysc (n = 40) |
|----------|--------------------------------------------|-------------------------------------------|
| nsc1     | 0.34                                       |                                           |
| nsc2     | 0.18                                       |                                           |
| nsc3     | 0.89                                       |                                           |
| nsc4     | 0.94                                       |                                           |
| nsc5     | 0.90                                       |                                           |
| sci1     |                                            | 0.62                                      |
| sci2     |                                            | 0.44                                      |
| sci3     |                                            | 0.50                                      |
| sci4     |                                            | 0.55                                      |
| sci5     |                                            | 0.92                                      |
| sci6     |                                            | 0.93                                      |
| sci7     |                                            | 0.94                                      |
